# Supplementary material for: Successful Development of Bacteriocins into Therapeutic Formulation for Treatment of MRSA Skin Infection in a Murine Model
Source: PubMed Central journal article supplement (PMC7674055; doi:10.1128/aac.00829-20), 2020-11-17
Supplement: AAC.00829-20-s0001.pdf [file AAC.00829-20-s0001.pdf]

**Supplemental Table 1. Range of MIC values ( $\mu\text{g/ml}$ ) of GarKS and MP1 against selected bacteria.**

| Strain ↓/ Antimicrobial → | GarKS | MP1    |
|---------------------------|-------|--------|
| Lactococci (n=7)          | 1-4   | 1-5    |
| Listeria (n=6)            | 1-4   | 1-5    |
| Enterococci (n=7)         | 2-20  | 2.5-10 |

**Supplemental Table 2. MIC values of selected antimicrobials ( $\mu\text{g/ml}$ ), as single components and formulation mixture against different strains of *S. aureus*.**

| Strain →<br>Antibiotic ↓ | Ery   | Str  | Tet  | Cam | Kan  | GarKS | MP1  | PenG  | Combined activity<br>PenG/GarKS/MP1 |
|--------------------------|-------|------|------|-----|------|-------|------|-------|-------------------------------------|
| LMG3322                  | <2.5  | 62   | <0.3 | 8   | 64   | 16    | >1.8 | <0.24 | <0.24/ <0.12 /<0.002                |
| LMG3255                  | <2.5  | 125  | 2.4  | 16  | >125 | 32    | >1.8 | <0.24 | <0.24/ <0.12 /<0.002                |
| LMG3271                  | <2.5  | 125  | 2.4  | 16  | 64   | 32    | >1.8 | <0.24 | <0.24/ <0.12 /<0.002                |
| LMG3314                  | <2.5  | 62   | 1.2  | 8   | 64   | 32    | 0.4  | <0.24 | <0.24/ <0.12 /<0.002                |
| LMG3328                  | <2.5  | 62   | 1.2  | 8   | 32   | 32    | 0.9  | <0.24 | <0.24/ <0.12 /<0.002                |
| LMG3307                  | <2.5  | 62   | 0.6  | 8   | 64   | 32    | 0.9  | <0.24 | <0.24/ <0.12 /<0.002                |
| LMG3242                  | <2.5  | 250  | 1.2  | 8   | >125 | 32    | 0.4  | 0.24  | <0.24/ <0.12 /<0.002                |
| LMG3264                  | <2.5  | >250 | 2.4  | 16  | >125 | 32    | >1.8 | 4     | 0.5/0.24/0.003                      |
| LMG3266                  | >2500 | >125 | 1.2  | 32  | >125 | 32    | >1.8 | 64    | 8/4/ 0.05                           |
| LMG3258                  | <2.5  | 62   | 1.2  | 16  | 125  | 32    | 1.8  | 64    | 8/4/ 0.05                           |
| LMG3263                  | >2500 | 31   | 2.4  | 32  | >125 | 16    | 1.8  | 125   | 8/4/ 0.05                           |
| LMG3265                  | >2500 | 31   | 2.4  | 32  | 64   | 16    | 1.8  | 125   | 8/4/ 0.05                           |
| LMG3026                  | <2.5  | 31   | 77   | 8   | 16   | 16    | >1.8 | >2500 | 4/2/0.025                           |

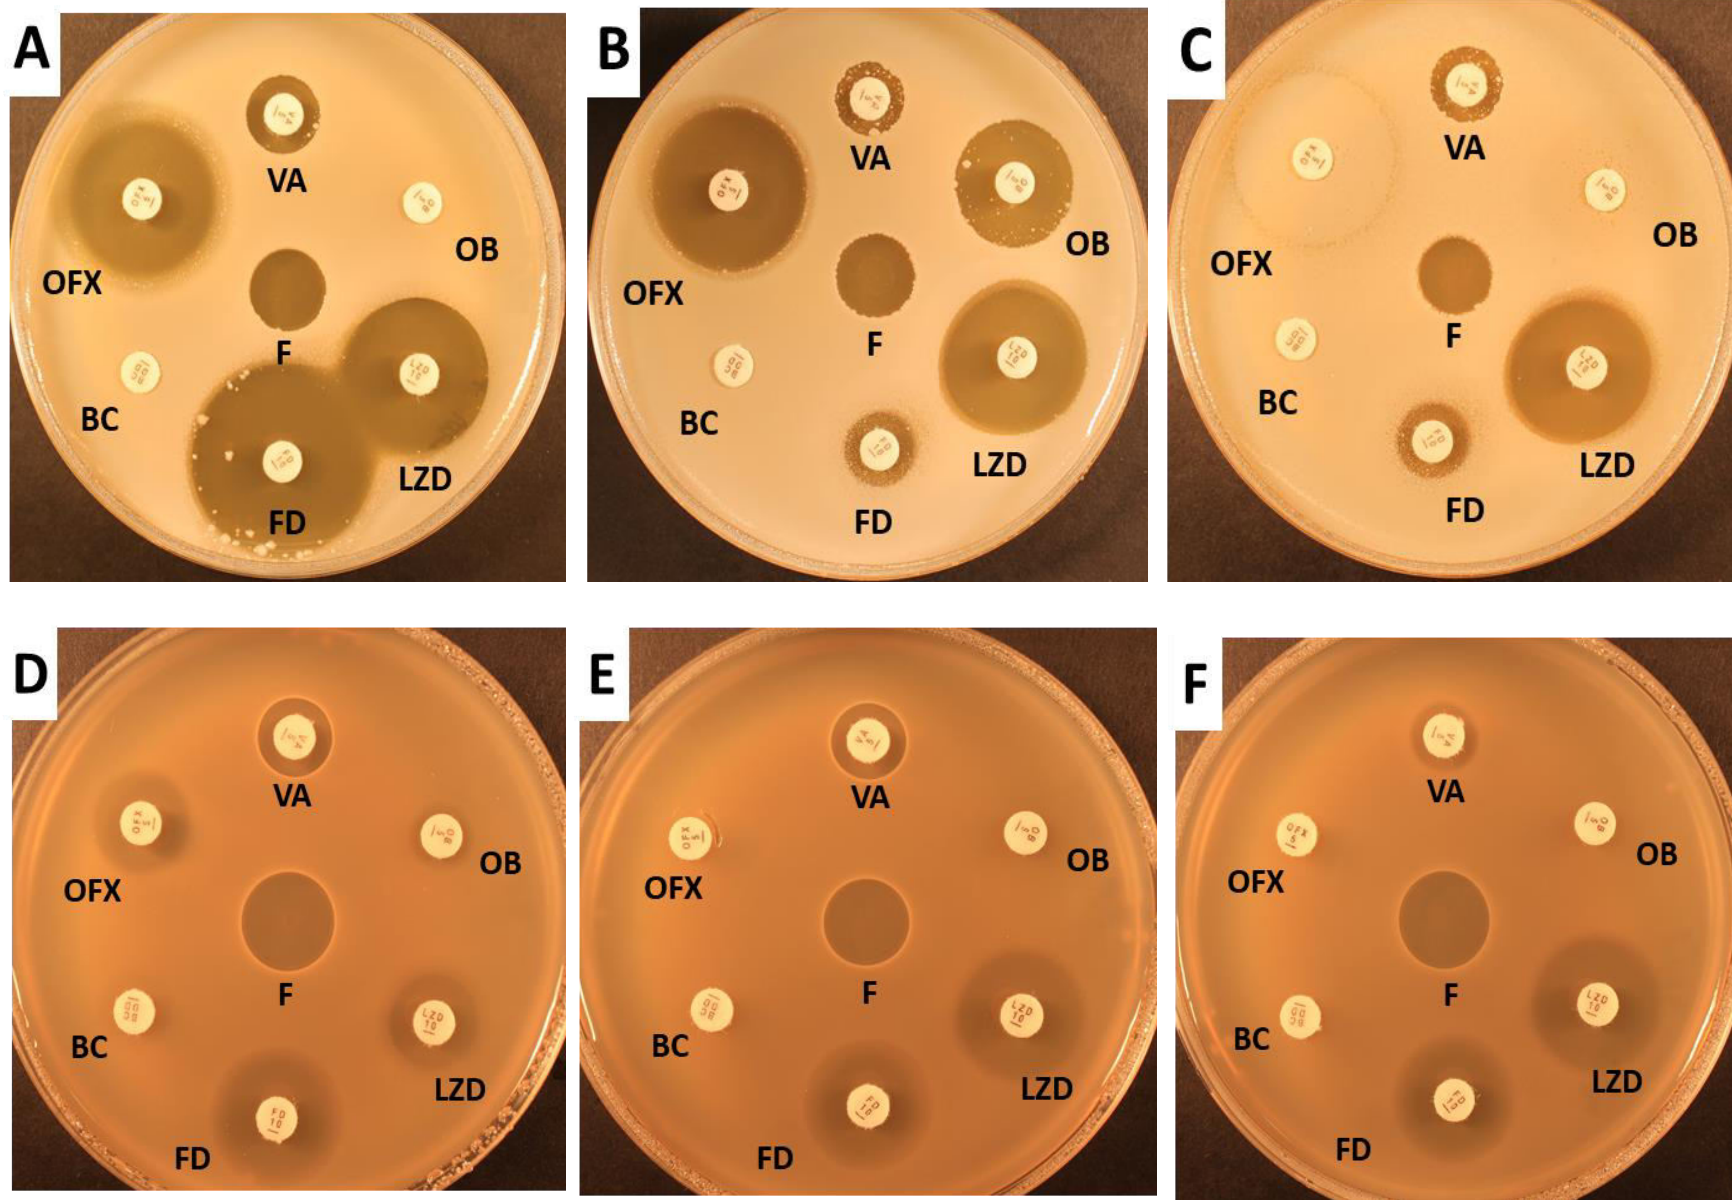

**Supplemental Figure 1.** Comparison of antimicrobial activity of the Formulation with selected antibiotics against *S. pseudintermedius* (A-C) and *Enterococcus faecalis* (D-F). Formulation (F) containing 15  $\mu\text{g}$  for GarKS, 15  $\mu\text{g}$  for PenG and 0.3  $\mu\text{g}$  for MP1; Antibiotic discs – VA-vancomycin, 5  $\mu\text{g}$ ; OB – cloxacillin, 5  $\mu\text{g}$ ; LZO – linezolid, 10  $\mu\text{g}$ ; FD – fusidic acid, 10 $\mu\text{g}$ ; BC – bacitracin, 0.04 Units; OFX – ofloxacin 5 $\mu\text{g}$ .

1 **Supplemental Figure 1.** Comparison of antimicrobial activity of the formulation with selected antibiotics  
2 against *S. pseudintermedius* (A-C) and *Enterococcus faecalis* (D-F). formulation (F) containing 15 µg for  
3 GarKS, 15 µg for PenG and 0.3 µg for MP1; Antibiotic discs – VA-vancomycin, 5 µg; OB – cloxacillin,  
4 5 µg; LZD – linezolid, 10 µg; FD – fusidic acid, 10µg; BC – bacitracin, 0.04 Units; OFX – ofloxacin 5µg.
